# Supplementary material
Source: Research Square preprint supplement (doi:10.21203/rs.3.rs-10212500/v1)
Supplement: Supplementary file 1 [file 0478232572747355db0f1134.docx]

# **Appendix**

# Tables

Table A1 Description of Network Indicators

| **Indicator** | **Formula** | **Parameter Description** | **Interpretation** |
| --- | --- | --- | --- |
| Relative degree centrality |  | = total number of nodes; = number of nodes connected to node | Reflects the direct influence of a node |
| Relative betweenness centrality |  | = total number of nodes;= number of shortest paths between nodes that pass through node | Reflects the brokerage power of a node |
| Relative closeness centrality |  | = total number of nodes;= shortest path distance between nodesand | Reflects the independence of a node from control by others |
| Network density |  | = number of cooperation edges; = number of nodes | Reflects the tightness of connections among nodes |
| *N-*clique |  | = node set of a maximal induced subgraph;= shortest path distance between nodesand ; = maximum path distance | Identifies cohesive subgroups based on reachability |
| *K*-plex |  | = node set of a maximal induced subgraph;= number of nodes in the subgraph;= degree of node within the subgraph; = maximum number of allowed missing internal edges | Identifies degree-based cohesive subgroups where each node misses at most *k* internal edges |
| *K*-core | , | = node set of a maximal induced subgraph;= degree of node i within the subgraph;= minimum degree threshold | Identifies connected core subgroups meeting a minimum degree requirement |
| Component |  | = node set of a maximal induced subgraph;= connection status (1 = tie exists, 0 = no tie) | Reflects internal connections within each subgraph |
| Core-periphery structure | - | - | Describes the hierarchical structure of a social network |

Note: The indicators selected in this study are derived from the research of Li et al. [33] and Chen et al. [9]

Table A2 Description of Modularity Indicator

| **Indicator** | **Formula** | **Parameter Description** | **Interpretation** |
| --- | --- | --- | --- |
| Modularity |  | = edge weight between nodes and == degree of node= community to which node belongs; , 0 otherwise; = total number of edges | Measures the ratio of intra-community link density to inter-community link density [43][44] |

Note: The formula is derived from the study of Blondel et al. [45]

Table A3 Network Density of Patent Applicants

|  | **Network Density** | **Number of Edges** |
| --- | --- | --- |
| Patent applicants | 0.0001 | 142 |

Table A4 Centrality of Patent Applicants

| **Statistic** | **Degree Centrality** | **Closeness Centrality** | **Betweenness Centrality** |
| --- | --- | --- | --- |
| Mean | 0.020 | 0.084 | 0.000 |
| Minimum | 0.000 | 0.084 | 0.000 |
| Maximum | 1.005 | 0.085 | 0.009 |

Table A5 Core Nodes in the Overall Applicant Network

| **Centrality Value** | **Applicant** |
| --- | --- |
| 12 | South China Agricultural University |
| 5 | Guangdong Pharmaceutical University  South China University of Technology  Shenzhen Osa Pharmaceutical Co., Ltd. |
| 4 | Guangzhou Institute of Respiratory Health |
| 3 | Lebi (Guangzhou) Health Industry Co., Ltd.  Guangdong University of Technology  Guangzhou Lianrui Pharmaceutical Co., Ltd.  Guangdong Provincial Hospital of Traditional Chinese Medicine  Guangzhou University of Chinese Medicine  Guangdong Institute of Poultry Science  Guangdong Yifang Pharmaceutical Co., Ltd.  Wuyi University  Perfect (Guangdong) Daily Necessities Co., Ltd.  Guangzhou Caizhilin Pharmaceutical Co., Ltd. |

Note: Only data with degree centrality ≥ 3 are shown due to space limitations.

Table A6 Network Density by Applicant City

|  | **Network Density** | **Number of Edges** |
| --- | --- | --- |
| Applicant cities | 0.0980 | 30 |

Table A7 Centrality by Applicant City

| **Applicant City** | **Degree Centrality** | **Closeness Centrality** | **Betweenness Centrality** |
| --- | --- | --- | --- |
| Guangzhou | 94.118 | 94.444 | 89.583 |
| Jiangmen | 5.882 | 50.000 | 0 |
| Shenzhen | 23.529 | 54.839 | 1.103 |
| Dongguan | 5.882 | 50.000 | 0 |
| Zhongshan | 17.647 | 54.839 | 5.270 |
| Foshan | 23.529 | 56.667 | 1.593 |
| Huizhou | 5.882 | 50.000 | 0 |
| Zhuhai | 5.882 | 50.000 | 0 |
| Hong Kong | 17.647 | 54.839 | 5.760 |
| Zhaoqing | 11.765 | 51.515 | 0 |
| Macao | 11.765 | 38.636 | 0.368 |
| Non-Guangdong | 11.765 | 53.125 | 0 |
| Yunfu | 11.765 | 51.515 | 0 |
| Yangjiang | 11.765 | 51.515 | 0 |
| Meizhou | 5.882 | 50.000 | 0 |
| Heyuan | 5.882 | 50.000 | 0 |
| Chaozhou | 5.882 | 50.000 | 0 |
| Qingyuan | 5.882 | 50.000 | 0 |

Table A8 Core-Periphery Results of the Overall Network (2016–2024)

| **Core Cities** | **Peripheral Cities** | **Goodness of Fit** |
| --- | --- | --- |
| Guangzhou, Jiangmen | Shenzhen, Foshan, Dongguan, Zhongshan, Zhuhai, Huizhou, Zhaoqing, Hong Kong, Macao, Yunfu, Yangjiang, Meizhou, Heyuan, Chaozhou, Qingyuan, Non-Guangdong | 0.827 |

Table A9 Core-Periphery Density Matrix (2016-2024)

|  | **Core** | **Periphery** |
| --- | --- | --- |
| Core | 5.000 | 1.344 |
| Periphery | 0.313 | 0.046 |

Table A10 Core Nodes in the Overall City Network

| **Degree Centrality Value** | **Applicant City** |
| --- | --- |
| 16 | Guangzhou |
| 4 | Shenzhen  Foshan |
| 3 | Zhongshan  Hong Kong |
| 2 | Yunfu  Macao  Zhaoqing  Yangjiang  Non-Guangdong |

Note: Only data with degree centrality ≥ 2 are shown due to space limitations.

Table A11 Degree Centrality by Applicant Type

| **Applicant Type** | **Degree** | **Ratio** |
| --- | --- | --- |
| Enterprise | 32.00 | 0.34 |
| University | 27.00 | 0.29 |
| Research institution | 23.00 | 0.24 |
| Government agency | 12.00 | 0.13 |

Note: Network Centralization = 31.48%.

Table A12 Network Density of Applicants by Phase

| **Phase** | **Network Density** | **Number of Edges** |
| --- | --- | --- |
| 2016—2020 | 0.0002 | 40 |
| 2021—2024 | 0.0001 | 109 |

Table A13 Centrality of Applicants by Phase

|  | **Degree Centrality** | | | **Closeness Centrality** | | | **Betweenness Centrality** | |
| --- | --- | --- | --- | --- | --- | --- | --- | --- |
| Phase | 2016–2020 | 2021–2024 | 2016–2020 | | 2021–2024 | 2016–2020 | | 2016–2024 |
| Mean | 0.05 | 0.02 | 0.24 | | 0.11 | 0 | | 0 |
| Std Dev | 0.11 | 0.06 | 0 | | 0 | 0 | | 0 |
| Sum | 19.18 | 23.17 | 17.05 | | 18.62 | 0.02 | | 0.02 |
| Variance | 0.01 | 0 | 0 | | 0 | 0 | | 0 |
| SSQ | 5.87 | 4.31 | 4.09 | | 1.98 | 0 | | 0 |
| MCSSQ | 4.99 | 3.74 | 0 | | 0 | 0 | | 0 |
| Euc Norm | 2.42 | 2.08 | 2.02 | | 1.41 | 0.01 | | 0.01 |
| Minimum | 0 | 0 | 0 | | 0.11 | 0 | | 0 |
| Maximum | 0.72 | 0.96 | 0.01 | | 0.11 | 0.01 | | 0.01 |

Table A14 Core Nodes in the 2016–2020 Applicant Sub-network

| **Degree Centrality Value** | **Applicant** |
| --- | --- |
| 3 | Guangzhou Caizhilin Pharmaceutical Co., Ltd.  Shenzhen Osa Pharmaceutical Co., Ltd. |
| 2 | Guangdong Zhidao Pharmaceutical Technology Co., Ltd.  Taiyuan (Guangzhou) Biotechnology Co., Ltd.  Perfect (Guangdong) Daily Necessities Co., Ltd.  FuLaite (Shenzhen) Precision Nutrition Food Group Co., Ltd.  Tianhe District Hospital of Traditional Chinese Medicine, Guangzhou |

Note: Only data with degree centrality ≥ 2 are shown due to space limitations.

Table A15 Core Nodes in the 2021–2024 Applicant Sub-network

| Degree Centrality Value | Applicant |
| --- | --- |
| 9 | South China Agricultural University |
| 4 | Guangdong Pharmaceutical University  South China University of Technology |
| 3 | Guangdong Institute of Poultry Science  Guangdong University of Technology  Guangzhou Institute of Respiratory Health  Guangzhou Lianrui Pharmaceutical Co., Ltd.  Guangdong Provincial Hospital of Traditional Chinese Medicine |
| 2 | Sun Yat-sen University  Guangzhou Huaxia Biopharmaceutical Co., Ltd.  Sericultural & Agri-Food Research Institute, Guangdong Academy of Agricultural Sciences  Guangzhou Beta Health Biotechnology Co., Ltd.  South China Collaborative Innovation Institute  Guangzhou New Journey Biotechnology Co., Ltd.  Guangzhou New Journey Life Science Co., Ltd.  Guangzhou New Journey Life Science Research Institute  Lebi (Guangzhou) Health Industry Co., Ltd.  Shenzhen Center for Disease Control and Prevention  Zhongshan Zhongzhi Pharmaceutical Group Co., Ltd.  Guangdong Yifang Pharmaceutical Co., Ltd.  First Affiliated Hospital of Guangzhou Medical University  Guangdong Institute of Microbiology  University of Macau  Wuyi University  Guangdong Xinbaotang Biotechnology Co., Ltd.  Perfect (Guangdong) Daily Necessities Co., Ltd.  Foshan Hospital of Traditional Chinese Medicine |

Note: Only data with degree centrality ≥ 2 are shown due to space limitations.

Table A16 Network Density of Cities by Phase

| **Phase** | **Network Density** | **Number of Edges** |
| --- | --- | --- |
| 2016—2020 | 0.0381 | 8 |
| 2021—2024 | 0.0956 | 26 |

Table A17 Centrality of Cities by Phase

| **Applicant City** | **Degree Centrality** | | **Closeness Centrality** | | **Betweenness Centrality** | | |
| --- | --- | --- | --- | --- | --- | --- | --- |
| Phase | 2016–2020 | 2021  –2024 | 2016  –2020 | 2021  –2024 | 2016  –2020 | | 2021  –2024 |
| Guangzhou | 21.43 | 93.75 | 11.97 | 94.12 | 15.38 | | 93.47 |
| Jiangmen | 0 | 6.25 | – | 50.00 | 0 | | 0 |
| Shenzhen | 14.29 | 18.75 | 11.57 | 53.33 | 6.59 | | 0.42 |
| Dongguan | 0 | 6.25 | – | 50.00 | 0 | | 0 |
| Zhongshan | 7.14 | 12.50 | 11.02 | 53.33 | | 0 | 5.28 |
| Foshan | 21.43 | 18.75 | 11.97 | 55.17 | | 15.38 | 0.69 |
| Huizhou | 0 | 6.25 | – | 50.00 | | 0 | 0 |
| Zhuhai | 0 | 6.25 | – | 50.00 | | 0 | 0 |
| Hong Kong | 0 | 18.75 | – | 55.17 | | 0 | 6.39 |
| Zhaoqing | 0 | 12.50 | – | 51.61 | | 0 | 0 |
| Macao | 0 | 12.50 | – | 38.10 | | 0 | 0.42 |
| Non-Guangdong | 14.29 | – | 11.57 | – | | 6.59 | – |
| Yunfu | 7.14 | 6.25 | 11.02 | 50.00 | | 0 | 0 |
| Yangjiang | 7.14 | 6.25 | 11.38 | 50.00 | | 0 | 0 |
| Meizhou | 7.14 | 6.25 | 11.38 | 50.00 | | 0 | 0 |
| Heyuan | – | 6.25 | – | 50.00 | | – | 0 |
| Chaozhou | – | 6.25 | – | 50.00 | | – | 0 |
| Qingyuan | – | 6.25 | – | 50.00 | | – | 0 |

Table A18 Core-Periphery Results of Sub-networks by Phase

| Phase | Core Cities | Peripheral Cities | Goodness of Fit |
| --- | --- | --- | --- |
| 2016–2020 | Guangzhou, Foshan | Jiangmen, Shenzhen, Dongguan, Zhongshan, Zhuhai, Huizhou, Zhaoqing, Hong Kong, Macao, Yunfu, Yangjiang, Meizhou, Non-Guangdong | 0.903 |
| 2021–2024 | Guangzhou, Shenzhen | Foshan, Zhuhai, Dongguan, Jiangmen, Zhongshan, Huizhou, Zhaoqing, Hong Kong, Macao, Yunfu, Yangjiang, Meizhou, Heyuan, Chaozhou, Qingyuan | 0.830 |

Table A19 Core Nodes in the 2016–2020 Applicant City Sub-Network

| **Degree Centrality Value** | **Applicant City** |
| --- | --- |
| 3 | Guangzhou  Foshan |
| 2 | Shenzhen  Non-Guangdong |
| 1 | Meizhou  Yangjiang  Zhongshan  Yunfu |

Note: Only data with degree centrality ≥ 1 are shown due to space limitations.

Table A20 Core Nodes in the 2021–2024 Applicant City Sub-Network

| **Degree Centrality Value** | **Applicant City** |
| --- | --- |
| 15 | Guangzhou |
| 3 | Hong Kong  Foshan  Shenzhen |
| 2 | Zhongshan  Macao  Zhaoqing |

Note: Only data with degree centrality ≥ 2 are shown.

Table A21 Network Density of Applicant Types by Phase

| **Phase** | **Network Density** | **Number of Edges** |
| --- | --- | --- |
| 2016–2020 | 0.5833 | 7 |
| 2021–2024 | 1 | 12 |

Table A22 Centrality of Applicant Types by Phase (Unit: %)

| Applicant Type | Degree Centrality | | Closeness Centrality | | Betweenness Centrality | |
| --- | --- | --- | --- | --- | --- | --- |
| Phase | 2016–2020 | 2021–2024 | 2016–2020 | 2021–2024 | 2016–2020 | 2021–2024 |
| Government Agency | 66.67 | 100.00 | 75 | 100.00 | 0 | 0 |
| Enterprise | 66.67 | 100.00 | 75 | 100.00 | 0 | 0 |
| University | 100.00 | 100.00 | 100.00 | 100.00 | 16.67 | 0 |
| Research Institution | 100.00 | 100.00 | 100.00 | 100.00 | 16.67 | 0 |

Table A23 Results of QAP correlation analysis

| **Variable pair** | **Pearson correlation coefficient** | | **QAP correlation coefficient** | **Significance (p-value)** |
| --- | --- | --- | --- | --- |
| Applicant collaboration & Geographical proximity matrix | 0.069*** | 0.07*** | | 0.000 |
| Applicant collaboration & technological collaboration | 0.023** | 0.02** | | 0.001 |

Note: 1 *** p < 0.001，** p < 0.01，* p < 0.05。2 Number of permutations = 5000.

Table A24 Results of QAP regression analysis

| **Independent variable** | **Unstandardized coefficient** | **Standardized coefficient** | **Significance** | **Proportion ≥ current value** | **Proportion ≤ current value** |
| --- | --- | --- | --- | --- | --- |
| Constant | 0.002772 | 0.000000 | — | — | — |
| Geographical proximity matrix | 0.012927*** | 0.068792*** | 0.000 | 0.000 | 1.000 |
| Technological proximity matrix | 0.019634** | 0.022189** | 0.002 | 0.002 | 0.999 |
| Adjusted *R*2 | 0.005 | | | | |
| Model significance | 0.000*** | | | | |
| Number of observations | 45156 | | | | |

Note: 1 *** p < 0.001，** p < 0.01，* p < 0.05。2 Number of permutations = 5000.

Table A25 Core IPC categories and definitions

| **IPC code** | **Definition** |
| --- | --- |
| A23L33/00 | Modifying nutritive qualities of [foods](https://www.wipo.int/classifications/ipc/en/ITsupport/Version20170101/transformations/ipc/20170101/en/htm/A23L.htm" \l "70); Dietetic products; [Preparation](https://www.wipo.int/classifications/ipc/en/ITsupport/Version20170101/transformations/ipc/20170101/en/htm/A23L.htm" \l "1549) or [treatment](https://www.wipo.int/classifications/ipc/en/ITsupport/Version20170101/transformations/ipc/20170101/en/htm/A23L.htm" \l "1544) thereof |
| A23L33/105 | [Plant](https://www.wipo.int/classifications/ipc/en/ITsupport/Version20170101/transformations/ipc/20170101/en/htm/A23L.htm" \l "3548) extracts, their artificial duplicates or their derivatives |
| A23K10/30 | from [material](https://www.wipo.int/classifications/ipc/en/ITsupport/Version20190101/transformations/ipc/20190101/en/htm/A23K.htm" \l "1539) of [plant](https://www.wipo.int/classifications/ipc/en/ITsupport/Version20190101/transformations/ipc/20190101/en/htm/A23K.htm" \l "3548) origin, e.g. roots, seeds or hay; from [material](https://www.wipo.int/classifications/ipc/en/ITsupport/Version20190101/transformations/ipc/20190101/en/htm/A23K.htm" \l "1539) of fungal origin, e.g. mushrooms  enzymes, |
| A23K20/174 | Vitamins |
| A61K8/9789 | Magnoliopsida [dicotyledons] |
| A61K36/752 | Citrus, e.g. lime, orange or lemon |
| A61K47/10 | Alcohols; Phenols; Salts thereof, e.g. glycerol; Polyethylene glycols [PEG]; Poloxamers; PEG/POE alkyl ethers |
| A61K131/00 | Containing or obtained from seeds, nuts, fruits or grains |
| A61P1/00 | [Drugs](https://www.wipo.int/classifications/ipc/en/ITsupport/Version20180101/transformations/ipc/20180101/en/htm/A61P.htm" \l "145) for disorders of the alimentary tract or the digestive system |
| A61P1/16 | for liver or gallbladder disorders, e.g. hepatoprotective agents, cholagogues, litholytics |
| A61P11/00 | [Drugs](https://www.wipo.int/classifications/ipc/en/ITsupport/Version20180101/transformations/ipc/20180101/en/htm/A61P.htm" \l "145) for disorders of the respiratory system |
| A61P29/00 | Non-central analgesic, antipyretic or antiinflammatory agents, e.g. antirheumatic agents; Non-steroidal antiinflammatory [drugs](https://www.wipo.int/classifications/ipc/en/ITsupport/Version20180101/transformations/ipc/20180101/en/htm/A61P.htm" \l "145) (NSAIDs) |
| A61P31/04 | Antibacterial agents |
| A61P31/14 | for RNA viruses |
| A61P35/00 | Antineoplastic agents |
| A61P39/00 | General protective or antinoxious agents |
| A61P39/06 | Free radical scavengers or antioxidants |
| A61Q19/00 | [Preparations](https://www.wipo.int/classifications/ipc/en/ITsupport/Version20230101/transformations/ipc/20230101/en/htm/A61Q.htm" \l "1549) for care of the skin |
| A61Q19/08 | Anti-ageing [preparations](https://www.wipo.int/classifications/ipc/en/ITsupport/Version20230101/transformations/ipc/20230101/en/htm/A61Q.htm" \l "1549) |
| C12R1/645 | Fungi |

Note: IPC definitions are sourced from the World Intellectual Property Organization (WIPO)[46-51]
